# Supplementary material for: The Extracellular Small Leucine-Rich Proteoglycan Biglycan Is a Key Player in Gastric Cancer Aggressiveness
Source: MDPI journal article supplement (doi:10.3390/cancers13061330), 2021-03-16
Supplement: s1 [file s1]

# The Extracellular Small Leucine-Rich Proteoglycan Biglycan is a Key Player in Gastric Cancer Aggressiveness

Filipe Pinto, Liliana Santos-Ferreira, Marta T. Pinto, Catarina Gomes and Celso A. Reis

## Supplementary Figures

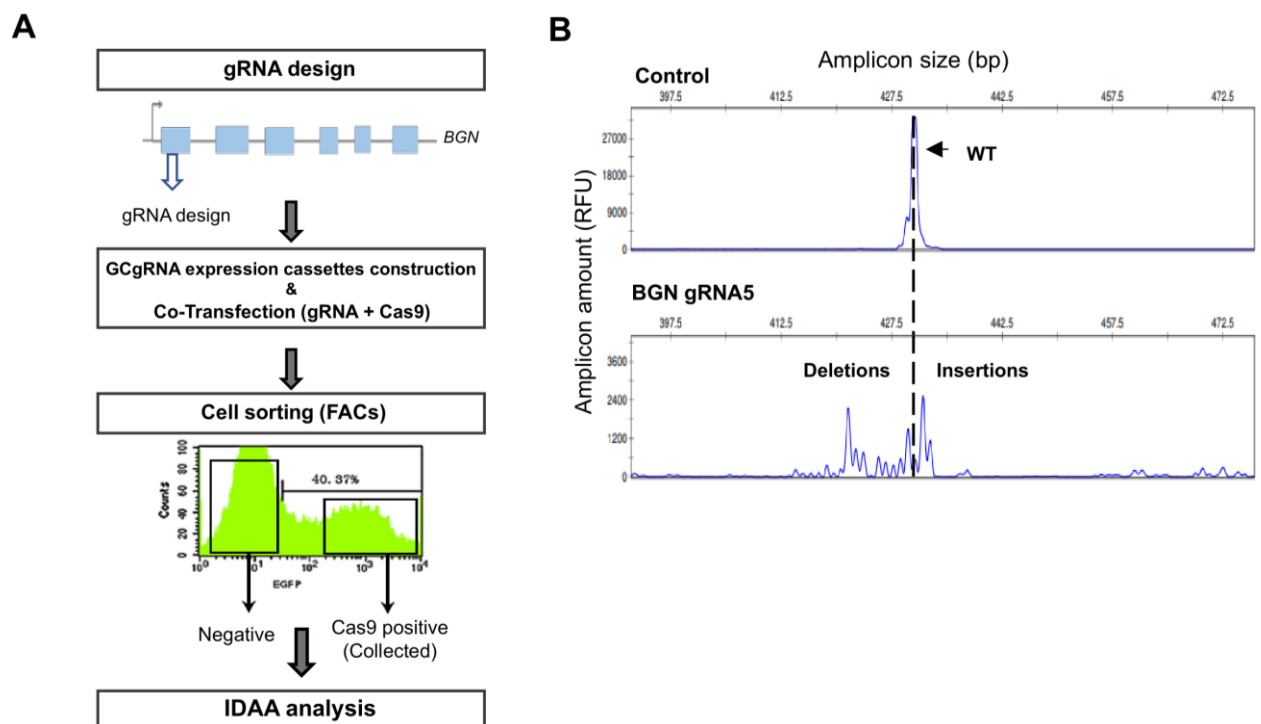

**Figure S1.** Biglycan knock out (KO) gRNA validation by CRISPR/cas9 technology accordingly to [39,40]. **(A)** Scheme of the CRISPR/cas9 system used to validate the biglycan KO clones: i) six gRNAs targeting exon 1 and 2 of *BGN* gene were design using DESKGEN (<https://www.deskgen.com/landing/>); ii) the GCgRNA expression cassettes were constructed using a tri-primer amplification protocol and co-transfected with a plasmid containing CAS9 in the HEK-293 cell lines; iii) Cas9 positive cells were sorted and indels detected by Indel Detection by Amplicon Analysis (IDAA). **(B)** IDAA profile of control DNA (WT cells) and DNA from cells transfected with selected gRNA5. The gRNA 5 was able to promote both base pairs insertions and deletions (indels) in *BGN* target site.

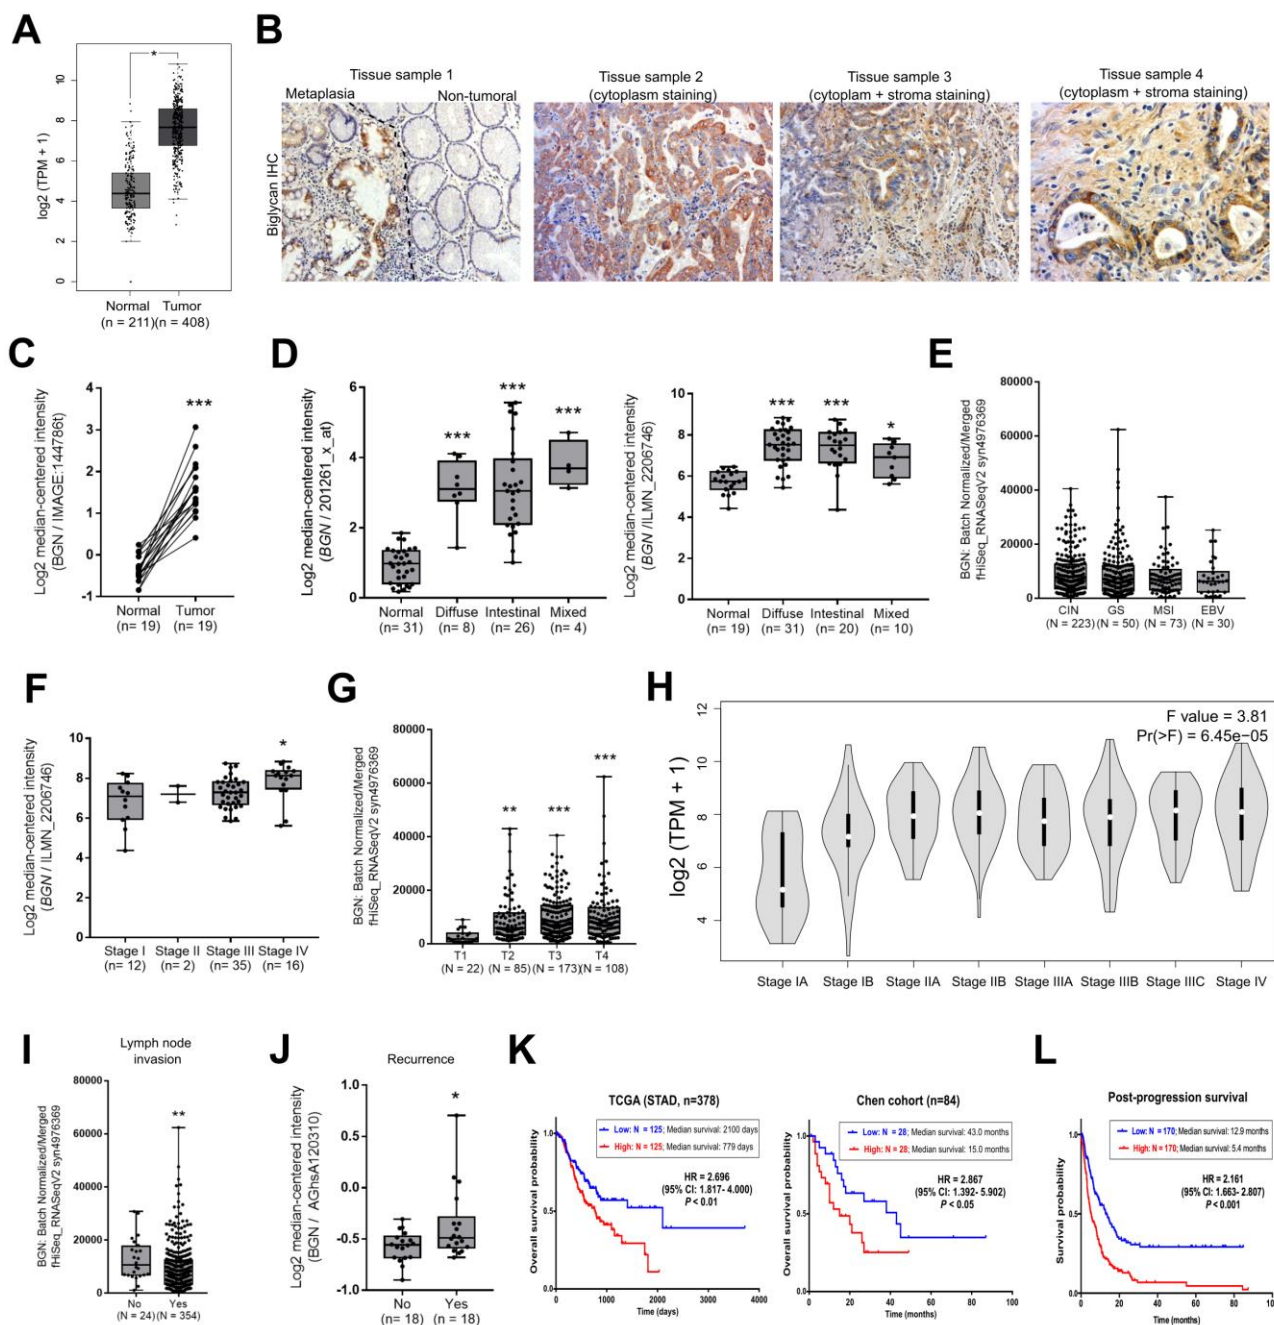

**Figure S2.** High levels of mRNA *BGN* (*biglycan*) are associated with tumor aggressiveness and poor survival in GC patients. **(A)** Expression levels of mRNA *BGN* in the STAD-TCGA cohort (tumor,  $n = 408$  vs normal,  $n = 211$ ). **(B)** Representative images of biglycan immunohistochemistry in GC tissues (4 cases). Biglycan is mostly absent in normal gastric glands (tissue sample 1, 200 $\times$ ) and it is present at both cancer cell cytoplasm and in the tumor stroma (tissue sample 2, 200 $\times$ ; tissue sample 3, 200 $\times$ ; and tissue sample 4, 400 $\times$ ). **(C)** *BGN* expression in patient tumor and normal paired-wise samples (Chen cohort). **(D)** *BGN* expression by Lauren subtype classification (left: Derrico cohort; right: Cho cohort). **(E)** *BGN* expression by TCGA molecular subtype (STAD-TCGA cohort). CIN, chromosomal instability; GS, genomically stable; MSI, microsatellite instability; and EBV, Epstein-Barr virus subtype. **(F, G)** *BGN* expression by tumor stage in the Cho and TCGA cohort, respectively. **(H)** *BGN* expression subdivided by detailed tumor stage (STAD-TCGA cohort). **(I)** *BGN* mRNA levels are elevated in patients with presence of lymph node invasion (STAD-TCGA cohort) **(J)** and recurrence (Takeno cohort). **(K)** Kaplan-Meier analysis between *BGN* mRNA levels (STAD-TCGA and Chen cohort) and GC overall survival. The categorization of patients' samples was assigned into low (first tercile, lowest 33.3%) and high (third tercile, highest 33.3%) subgroups according to the levels of *BGN* mRNA expression. **(L)** Post-progression

**A**

Ctrl +      MKN74      NCI-N87      MKN45      AGS

-    +    -    +    -    +    -    +    -    +    chABC

Mw (kDa): 150, 100, 75, 50, 37

Biglycan (~45 kDa)

β-actin (42 kDa)

**B**

BGN relative expression (normalized to β-actin)

Ctrl +    MKN74    NCI-N87    MKN45    AGS

**C**

Amplicon size (bp)

WT

KO.5

KO.12

Amplification amount (RFU)

**D**

gRNA5 alignment

gRNA5

WT

BGN KO.5 alignment(-2 bases)

WT

KO.5

BGN KO.12 alignment(+152 bases)

WT

KO.12

**Figure S3.** Immunodetection of biglycan in GC total cell lysate and genomic validation of biglycan knock out (KO) cells. **(A)** Biglycan characterization in total cell lysates samples from an intestinal cancer cell line Caco-2 (positive control) and from four GC cell lines (MKN74, MKN45, NCI.N87 and AGS) with and without chondroitinase ABC (chABC) treatment. **(B)** *BGN* mRNA levels in GC cell lines assessed by real time-PCR analysis. Data is presented as relative expression normalized for the  $\beta$ -actin housekeeping gene of three independent extractions in duplicate for each cell line. Values are means  $\pm$  standard error of the mean (S.E.M.). **(C)** Genomic indels were detected in two *BGN* KO clones by RFLP analysis (KO.5: deletion of 2 (-2) nucleotide base pairs; and KO.12: insertion of 152 (+152) nucleotide base pairs). **(D)** Validation of the detected indels by DNA Sanger sequence method. Sanger sequences were alignment and analyzed using TIDE and CRISP-ID algorithm.

Figure 3A

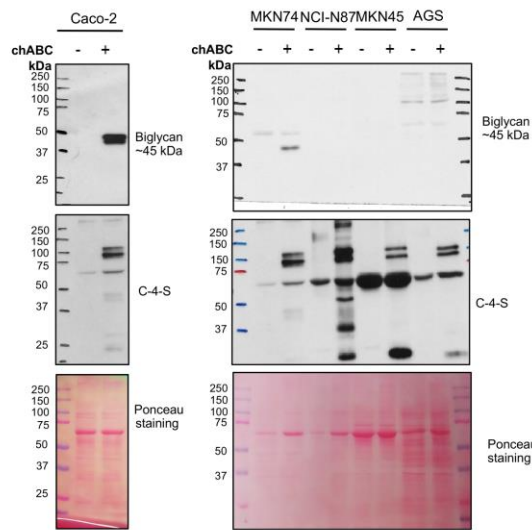

Figure 3B

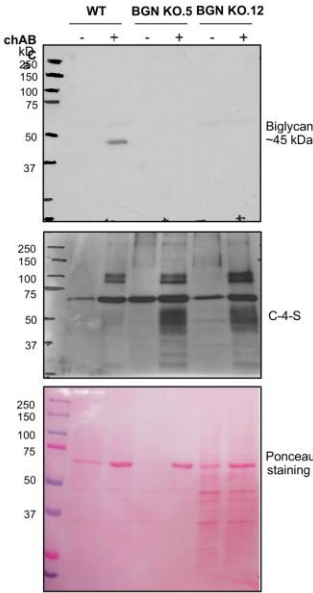

Figure 4D

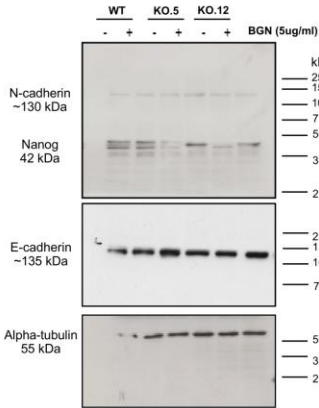

Figure 5D

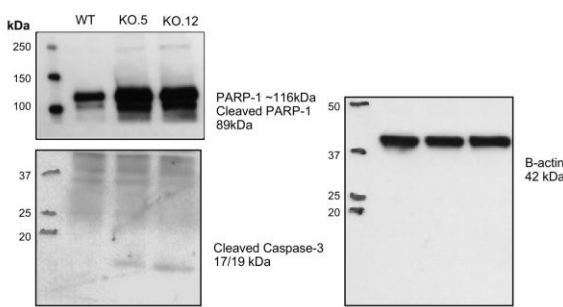

FigureS 3A

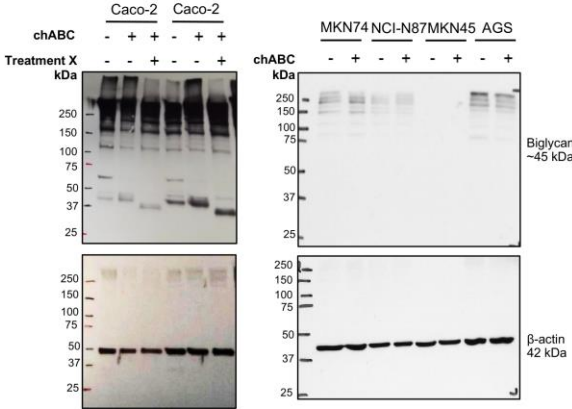

Figure 5J

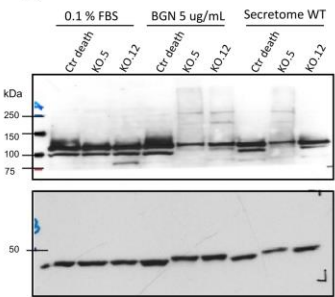

Figure S4. Uncropped western blots figures

**A**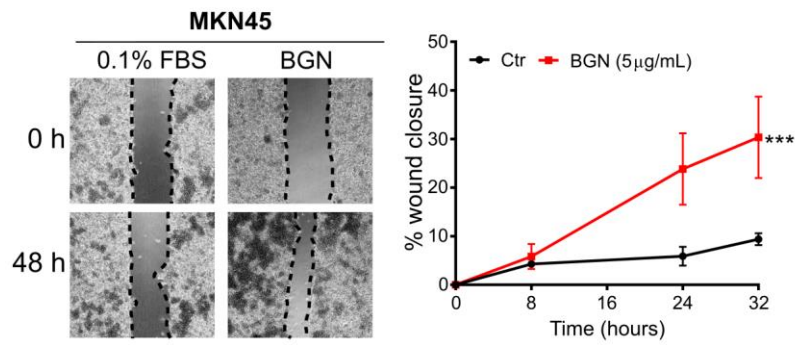**B**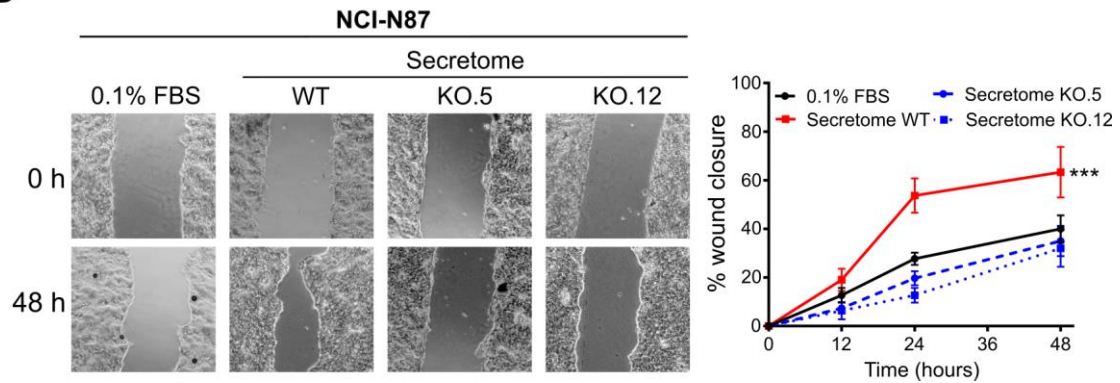

**Figure S5.** Biglycan-negative GC cells exposed to exogenous biglycan protein present increased cell migration capacity. **(A)** Treatment with 5 μg/ml of commercial purified biglycan is able to increase cell migration in the MKN45 biglycan-negative cell line. **(B)** Cell migration effect of biglycan-negative NCI-N87 exposed to secretomes from MKN74 WT or biglycan KO (KO.5 and KO.12). Only NCI-N87 exposed to secretome from MKN74 WT (biglycan positive) present increased capacity to migrate compared to NCI-N87 WTcontrol cells (0.1% FBS). Data are presented as the mean ± standard error of the mean (S.E.M.) of at least three independent experiments. \*\*\*, *p* value < 0.001.
